# Supplementary material
Source: MDPI journal article supplement (https://www.mdpi.com/2073-4395/13/3/718)
Supplement: s1 [file s1 › agronomy-2227868-supplementary.pdf]

# Use of Olive Industry By-Products for Value-Added Food Development

María E. García-Pastor, Marina Ródenas-Soriano, Alicia Dobón-Suárez, Pedro J. Zapata and María J. Giménez \*

Department of Food Technology, EPSO, University Miguel Hernández,  
Ctra. Beniel km. 3.2, 03312 Alicante, Spain

\* Correspondence: maria.gimenezt@umh.es; Tel.: +34-966749798

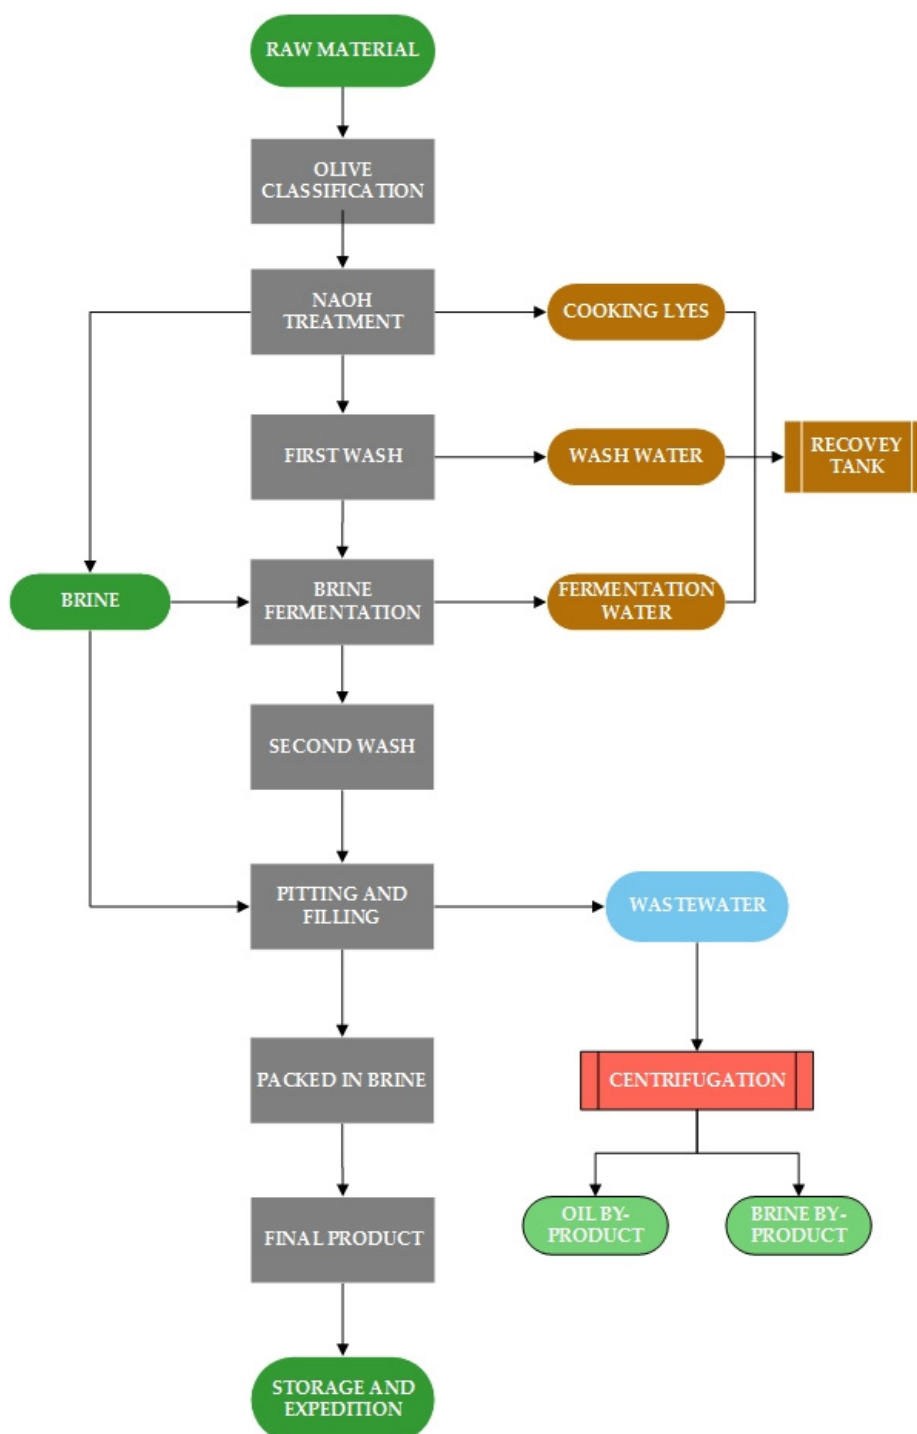

**Supplementary Figure S1.** Flow diagram of the olive pitting process from which the olive oil and brine by-products that are the object of study of the present experiment are obtained.

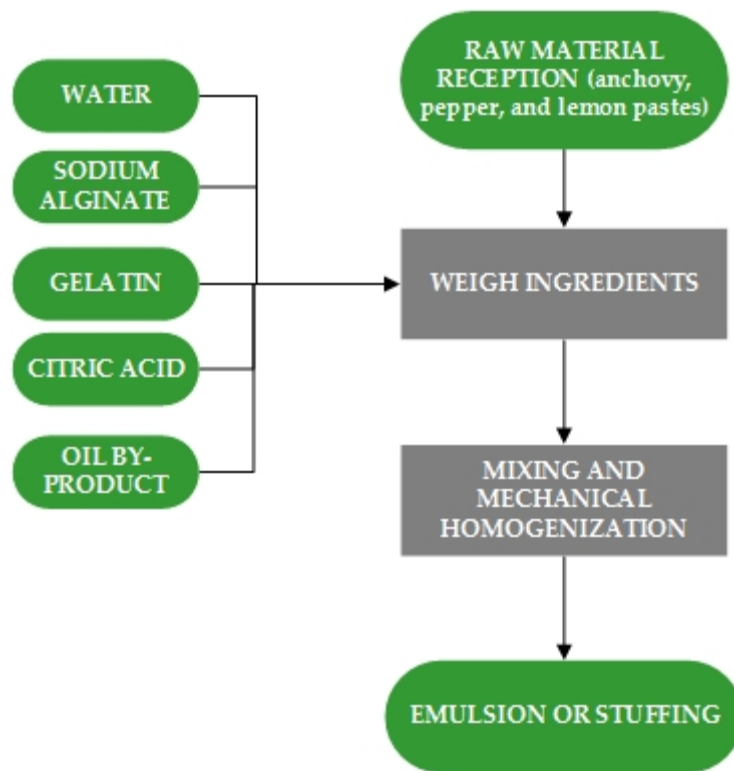

**Supplementary Figure S2.** Flow diagram of the development of three oil-emulsified pastes (anchovy, pepper, and lemon).

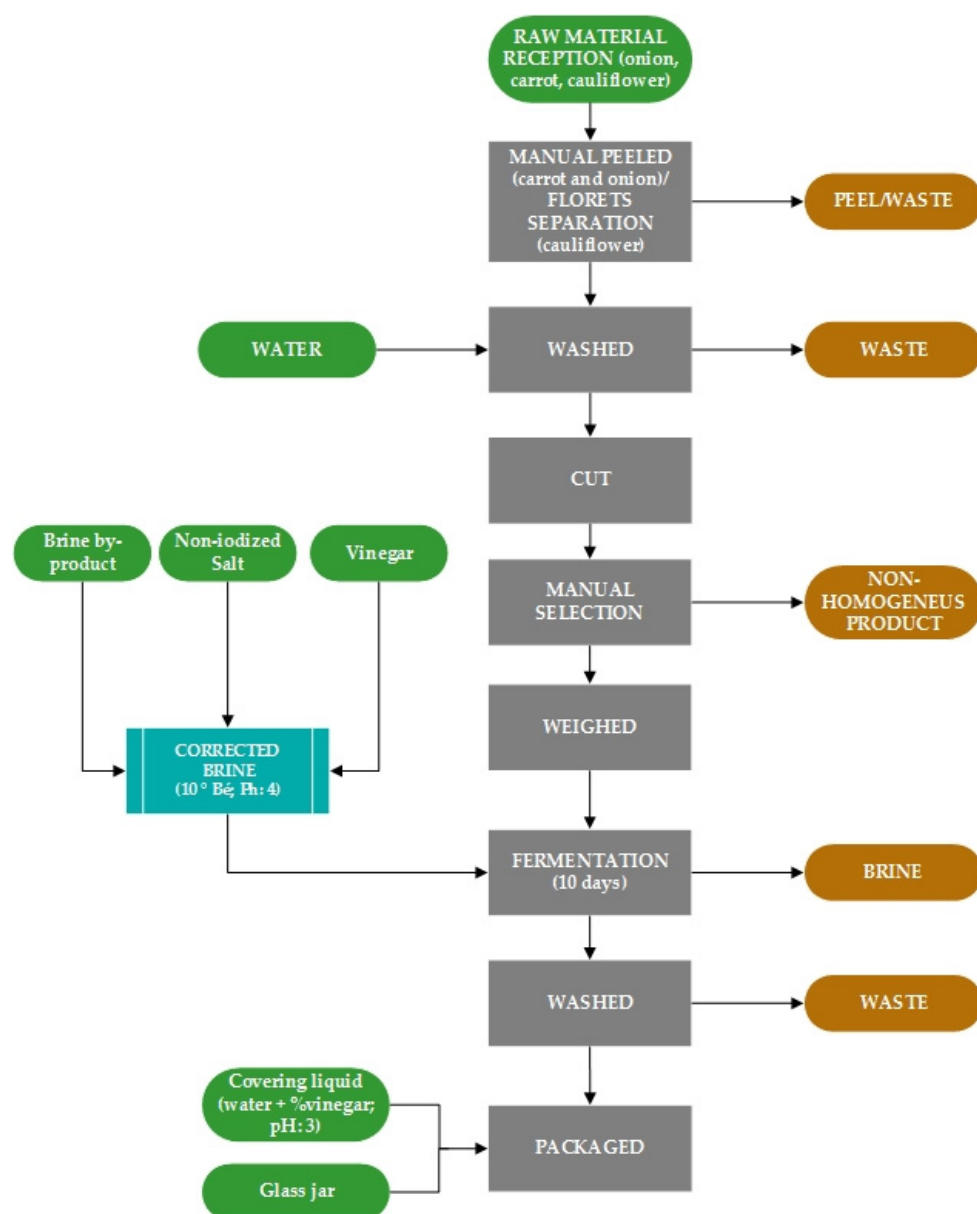

**Supplementary Figure S3.** Flow diagram of the development of three pickled vegetables (carrot, onion, and cauliflower) with the brine by-product.

**Supplementary Table S1.** Microbiological characteristics of brine by-product.

| Aerobic mesophilic <sup>†</sup> | Molds and yeasts <sup>‡</sup> | Enterobacteria <sup>▼</sup> | <i>E. coli</i> <sup>▼</sup> | <i>Salmonella</i> spp. <sup>‡</sup> | <i>Listeria</i> spp. <sup>‡</sup> | <i>Listeria monocytogenes</i> <sup>‡</sup> |
|---------------------------------|-------------------------------|-----------------------------|-----------------------------|-------------------------------------|-----------------------------------|--------------------------------------------|
| 2 · 10 <sup>3</sup>             | 5 · 10 <sup>3</sup>           | Absence                     | Absence                     | Absence                             | +                                 | -                                          |

<sup>†</sup>Incubation count (CFU g<sup>-1</sup>) at 30 °C for 48 h. CFU: Colony Forming Unit.

<sup>‡</sup>Incubation count (CFU g<sup>-1</sup>) at 25 °C for 72 h. CFU: Colony Forming Unit.

<sup>▼</sup>Incubation count (absence or presence) at 37 °C for 24 h.

<sup>‡</sup>Count (absence or presence) performed by an outside laboratory.

<sup>‡</sup>Incubation count (positive or negative) at 37 °C for 24 h.
